# Supplementary material for: Multicommodity vs. Single-Commodity Routing
Source: Atypon-hosted journal article supplement (doi:10.1287/trsc.2014.0528), 2014-06-03
Supplement: trsc.2014.0528-sm-appendix.pdf [file trsc.2014.0528-sm-appendix.pdf]

# Multi-commodity vs. Single-commodity Routing

Claudia Archetti

Department of Quantitative Methods, University of Brescia, Brescia, Italy, archetti@eco.unibs.it

Ann Melissa Campbell

Department of Management Sciences, University of Iowa, Iowa City, IA, USA, ann-campbell@uiowa.edu

M. Grazia Speranza

Department of Quantitative Methods, University of Brescia, Brescia, Italy, speranza@eco.unibs.it

---

## Appendix

In Table 1 we report the detailed results of the computational study on large instances. The first five columns of the table give the instance characteristics: the benchmark original instance, the number of commodities, the probability that each commodity is requested by each customer, the demand range and the value of  $\alpha$ . Then, the following four columns refer to solution cost. First, we report the value of the C-VRP solution and then the percentage gap of the VRP, C-SDVRP and SDVRP with respect to the C-VRP, respectively. The last four columns refer to the number of routes. Again, we report the value of the C-VRP solution and then the percentage gap of the VRP, C-SDVRP and SDVRP with respect to the C-VRP, respectively. For each combination of characteristics, each line corresponds to one of the five randomly generated instances.

Table 1: Detailed results on large instances

|      |   |      |         |                |          | Cost  |       |         |       | Routes |       |         |       |
|------|---|------|---------|----------------|----------|-------|-------|---------|-------|--------|-------|---------|-------|
|      |   |      |         |                |          | C-VRP | VRP   | C-SDVRP | SDVRP | C-VRP  | VRP   | C-SDVRP | SDVRP |
| C101 | 2 | 60%  | [1;100] | $\alpha = 1.1$ | 2285.828 | 5.98  | 10.96 | 10.96   | 31    | -3.23  | 0.00  | 0.00    |       |
|      |   |      |         |                | 2508.654 | 8.80  | 13.10 | 13.10   | 36    | -2.78  | 0.00  | 0.00    |       |
|      |   |      |         |                | 2323.104 | 8.61  | 10.37 | 11.92   | 32    | -3.13  | 0.00  | 3.13    |       |
|      |   |      |         |                | 2414.225 | 8.76  | 11.01 | 11.01   | 34    | 2.94   | 5.88  | 5.88    |       |
|      |   |      |         |                | 2296.396 | 8.02  | 11.08 | 11.08   | 33    | 0.00   | 3.03  | 3.03    |       |
| C101 | 2 | 60%  | [1;100] | $\alpha = 1.5$ | 1825.381 | 10.24 | 13.79 | 13.79   | 24    | 4.17   | 4.17  | 4.17    |       |
|      |   |      |         |                | 1971.290 | 11.40 | 13.08 | 14.08   | 26    | 0.00   | 0.00  | 3.85    |       |
|      |   |      |         |                | 1857.747 | 13.30 | 14.17 | 14.85   | 24    | 0.00   | 0.00  | 4.17    |       |
|      |   |      |         |                | 1881.958 | 13.24 | 13.90 | 13.90   | 24    | 0.00   | 0.00  | 0.00    |       |
|      |   |      |         |                | 1845.434 | 13.58 | 16.32 | 16.32   | 25    | 4.00   | 8.00  | 8.00    |       |
| C101 | 2 | 60%  | [1;100] | $\alpha = 2$   | 1775.844 | 14.70 | 16.41 | 16.57   | 18    | 0.00   | 5.56  | 5.56    |       |
|      |   |      |         |                | 1871.573 | 13.41 | 14.43 | 14.43   | 20    | 0.00   | 5.00  | 5.00    |       |
|      |   |      |         |                | 1817.354 | 13.09 | 13.51 | 13.51   | 18    | 0.00   | 0.00  | 0.00    |       |
|      |   |      |         |                | 1875.298 | 17.14 | 17.91 | 17.91   | 18    | 0.00   | 0.00  | 0.00    |       |
|      |   |      |         |                | 1854.990 | 16.56 | 16.66 | 16.66   | 18    | 0.00   | 0.00  | 0.00    |       |
| C101 | 2 | 60%  | [1;100] | $\alpha = 2.5$ | 1577.939 | 17.82 | 18.03 | 18.03   | 14    | 0.00   | 0.00  | 0.00    |       |
|      |   |      |         |                | 1655.051 | 16.24 | 16.24 | 16.93   | 16    | 6.25   | 6.25  | 6.25    |       |
|      |   |      |         |                | 1652.841 | 19.71 | 19.91 | 19.91   | 15    | 6.67   | 6.67  | 6.67    |       |
|      |   |      |         |                | 1628.615 | 17.54 | 17.89 | 18.15   | 15    | 6.67   | 6.67  | 6.67    |       |
|      |   |      |         |                | 1633.911 | 19.06 | 19.42 | 19.42   | 14    | 0.00   | 0.00  | 0.00    |       |
| C101 | 2 | 60%  | [40;60] | $\alpha = 1.1$ | 3910.381 | 2.87  | 4.93  | 6.66    | 63    | 1.59   | 3.17  | 11.11   |       |
|      |   |      |         |                | 4166.529 | 2.87  | 5.35  | 15.37   | 66    | 0.00   | 1.52  | 15.15   |       |
|      |   |      |         |                | 3938.635 | 3.97  | 4.64  | 16.35   | 63    | 1.59   | 3.17  | 17.46   |       |
|      |   |      |         |                | 4081.495 | 2.62  | 5.90  | 15.80   | 64    | -3.13  | 0.00  | 15.63   |       |
|      |   |      |         |                | 3952.782 | 6.30  | 7.07  | 7.27    | 63    | 1.59   | 3.17  | 6.35    |       |
| C101 | 2 | 60%  | [40;60] | $\alpha = 1.5$ | 2923.051 | 6.98  | 8.11  | 8.11    | 43    | 0.00   | 2.33  | 2.33    |       |
|      |   |      |         |                | 3015.581 | 3.55  | 6.35  | 11.98   | 45    | -4.44  | 0.00  | 8.89    |       |
|      |   |      |         |                | 2866.297 | 7.11  | 8.11  | 12.75   | 43    | 0.00   | 2.33  | 9.30    |       |
|      |   |      |         |                | 2923.377 | 3.46  | 6.33  | 10.35   | 44    | -4.55  | 0.00  | 9.09    |       |
|      |   |      |         |                | 2885.484 | 8.61  | 8.89  | 12.88   | 43    | 0.00   | 0.00  | 9.30    |       |
| C101 | 2 | 60%  | [40;60] | $\alpha = 2$   | 2620.640 | 8.86  | 9.51  | 10.51   | 31    | 0.00   | 3.23  | 6.45    |       |
|      |   |      |         |                | 2772.815 | 8.10  | 9.48  | 9.48    | 34    | 2.94   | 2.94  | 2.94    |       |
|      |   |      |         |                | 2689.183 | 9.61  | 10.43 | 10.83   | 31    | 3.23   | 3.23  | 6.45    |       |
|      |   |      |         |                | 2761.277 | 10.53 | 11.51 | 12.80   | 31    | 0.00   | 0.00  | 3.23    |       |
|      |   |      |         |                | 2697.566 | 8.44  | 8.63  | 8.63    | 32    | 3.13   | 3.13  | 3.13    |       |
| C101 | 2 | 60%  | [40;60] | $\alpha = 2.5$ | 2222.101 | 9.96  | 11.43 | 11.43   | 25    | 4.00   | 4.00  | 4.00    |       |
|      |   |      |         |                | 2330.052 | 12.30 | 12.80 | 12.80   | 26    | 0.00   | 3.85  | 3.85    |       |
|      |   |      |         |                | 2281.616 | 13.78 | 14.33 | 14.33   | 25    | 4.00   | 4.00  | 4.00    |       |
|      |   |      |         |                | 2342.424 | 14.51 | 14.51 | 14.51   | 26    | 7.69   | 7.69  | 7.69    |       |
|      |   |      |         |                | 2314.411 | 14.71 | 14.71 | 14.71   | 25    | 4.00   | 4.00  | 4.00    |       |
| C101 | 2 | 100% | [1;100] | $\alpha = 1.1$ | 3975.565 | 17.89 | 20.85 | 20.85   | 50    | -4.00  | 0.00  | 0.00    |       |
|      |   |      |         |                | 4111.800 | 20.21 | 25.05 | 25.05   | 50    | -8.00  | -2.00 | -2.00   |       |
|      |   |      |         |                | 4256.346 | 15.57 | 20.67 | 20.72   | 54    | -7.41  | 0.00  | 1.85    |       |
|      |   |      |         |                | 4272.572 | 14.97 | 21.91 | 21.91   | 54    | -7.41  | 0.00  | 0.00    |       |
|      |   |      |         |                | 4048.559 | 19.96 | 24.34 | 24.34   | 50    | -8.00  | 0.00  | 0.00    |       |
| C101 | 2 | 100% | [1;100] | $\alpha = 1.5$ | 3104.438 | 22.65 | 24.08 | 24.08   | 36    | -2.78  | 0.00  | 0.00    |       |
|      |   |      |         |                | 3163.624 | 25.30 | 26.46 | 26.70   | 37    | -2.70  | 0.00  | 2.70    |       |
|      |   |      |         |                | 3282.612 | 20.61 | 23.04 | 23.38   | 39    | -2.56  | 0.00  | 2.56    |       |
|      |   |      |         |                | 3303.410 | 23.24 | 24.32 | 24.51   | 40    | 0.00   | 2.50  | 5.00    |       |
|      |   |      |         |                | 3125.704 | 24.83 | 26.29 | 26.35   | 36    | -2.78  | 0.00  | 2.78    |       |
| C101 | 2 | 100% | [1;100] | $\alpha = 2$   | 2535.470 | 14.57 | 16.03 | 16.03   | 27    | 0.00   | 0.00  | 0.00    |       |
|      |   |      |         |                | 2600.542 | 14.67 | 16.56 | 16.56   | 28    | 0.00   | 3.57  | 3.57    |       |
|      |   |      |         |                | 2659.944 | 13.43 | 15.17 | 15.17   | 29    | -3.45  | 0.00  | 0.00    |       |
|      |   |      |         |                | 2654.263 | 13.72 | 14.48 | 14.48   | 29    | 0.00   | 0.00  | 0.00    |       |
|      |   |      |         |                | 2579.543 | 15.07 | 16.26 | 16.26   | 27    | 0.00   | 0.00  | 0.00    |       |
| C101 | 2 | 100% | [1;100] | $\alpha = 2.5$ | 2211.294 | 18.94 | 20.38 | 20.38   | 22    | 0.00   | 4.55  | 4.55    |       |
|      |   |      |         |                | 2232.381 | 16.77 | 17.72 | 17.72   | 22    | 0.00   | 0.00  | 0.00    |       |
|      |   |      |         |                | 2266.483 | 16.20 | 16.93 | 16.93   | 23    | 0.00   | 0.00  | 0.00    |       |
|      |   |      |         |                | 2293.781 | 16.40 | 16.73 | 17.23   | 24    | 0.00   | 4.17  | 4.17    |       |
|      |   |      |         |                | 2231.645 | 17.78 | 18.88 | 18.88   | 22    | 0.00   | 4.55  | 4.55    |       |

|      |   |      |         |                | Cost     |        |         |       | Routes |        |         |        |
|------|---|------|---------|----------------|----------|--------|---------|-------|--------|--------|---------|--------|
|      |   |      |         |                | C-VRP    | VRP    | C-SDVRP | SDVRP | C-VRP  | VRP    | C-SDVRP | SDVRP  |
| C101 | 2 | 100% | [40;60] | $\alpha = 1.1$ | 6819.722 | 15.38  | 17.84   | 17.84 | 94     | -6.38  | -1.06   | -1.06  |
|      |   |      |         |                | 6998.930 | 17.55  | 20.74   | 24.67 | 95     | -5.26  | -2.11   | 9.47   |
|      |   |      |         |                | 6986.562 | 17.40  | 17.71   | 30.26 | 98     | -2.04  | -1.02   | 19.39  |
|      |   |      |         |                | 7060.633 | 18.27  | 19.11   | 23.09 | 99     | -1.01  | 3.03    | 9.09   |
|      |   |      |         |                | 6896.242 | 16.32  | 19.73   | 25.82 | 95     | -5.26  | 0.00    | 11.58  |
| C101 | 2 | 100% | [40;60] | $\alpha = 1.5$ | 4839.192 | -10.32 | 19.13   | 19.13 | 63     | -44.44 | -1.59   | -1.59  |
|      |   |      |         |                | 4995.625 | -7.20  | 21.74   | 21.74 | 64     | -46.88 | 0.00    | 4.69   |
|      |   |      |         |                | 4967.782 | -13.13 | 19.96   | 19.96 | 66     | -43.94 | 1.52    | 1.52   |
|      |   |      |         |                | 5011.876 | -11.74 | 21.34   | 21.34 | 66     | -42.42 | 3.03    | 3.03   |
|      |   |      |         |                | 4961.480 | -6.69  | 22.04   | 22.04 | 66     | -37.88 | 4.55    | 4.55   |
| C101 | 2 | 100% | [40;60] | $\alpha = 2$   | 3810.287 | 5.64   | 12.26   | 13.95 | 46     | -8.70  | 0.00    | 6.52   |
|      |   |      |         |                | 3839.045 | 6.35   | 10.22   | 10.22 | 46     | -8.70  | 0.00    | 0.00   |
|      |   |      |         |                | 3863.475 | 6.94   | 11.92   | 11.92 | 47     | -6.38  | 0.00    | 0.00   |
|      |   |      |         |                | 3873.251 | 7.18   | 10.69   | 13.33 | 47     | -6.38  | 0.00    | 6.38   |
|      |   |      |         |                | 3837.660 | 6.32   | 11.40   | 11.40 | 46     | -8.70  | 0.00    | 0.00   |
| C101 | 2 | 100% | [40;60] | $\alpha = 2.5$ | 3121.872 | 9.49   | 12.41   | 12.41 | 36     | -8.33  | 2.78    | 2.78   |
|      |   |      |         |                | 3149.308 | 7.19   | 11.47   | 11.47 | 36     | -5.56  | 0.00    | 0.00   |
|      |   |      |         |                | 3167.846 | 6.54   | 12.23   | 12.60 | 36     | -13.89 | 0.00    | 2.78   |
|      |   |      |         |                | 3186.239 | 3.21   | 11.65   | 11.65 | 37     | -13.51 | 0.00    | 0.00   |
|      |   |      |         |                | 3132.123 | 7.51   | 11.63   | 11.79 | 36     | -5.56  | 0.00    | 5.56   |
| C101 | 3 | 60%  | [1;100] | $\alpha = 1.1$ | 2708.298 | 14.68  | 17.54   | 17.54 | 36     | 0.00   | 2.78    | 2.78   |
|      |   |      |         |                | 2843.568 | 14.13  | 15.37   | 15.37 | 38     | 0.00   | 2.63    | 2.63   |
|      |   |      |         |                | 2957.865 | 11.53  | 15.50   | 15.50 | 38     | 0.00   | 2.63    | 2.63   |
|      |   |      |         |                | 2833.850 | 17.38  | 20.02   | 20.02 | 38     | 0.00   | 5.26    | 5.26   |
|      |   |      |         |                | 3008.333 | 12.44  | 15.91   | 15.91 | 39     | 2.56   | 2.56    | 2.56   |
| C101 | 3 | 60%  | [1;100] | $\alpha = 1.5$ | 2237.009 | 22.54  | 22.90   | 23.15 | 26     | 0.00   | 0.00    | 3.85   |
|      |   |      |         |                | 2344.371 | 21.22  | 22.70   | 22.70 | 29     | 3.45   | 6.90    | -27.59 |
|      |   |      |         |                | 2341.657 | 17.82  | 18.51   | 18.51 | 28     | 3.57   | 0.00    | 0.00   |
|      |   |      |         |                | 2275.210 | 22.16  | 22.51   | 23.13 | 27     | 0.00   | 0.00    | 3.70   |
|      |   |      |         |                | 2445.740 | 18.07  | 20.76   | 20.76 | 29     | 0.00   | 3.45    | 3.45   |
| C101 | 3 | 60%  | [1;100] | $\alpha = 2$   | 2182.763 | 24.33  | 24.33   | 24.33 | 20     | 5.00   | 5.00    | 5.00   |
|      |   |      |         |                | 2267.487 | 26.28  | 27.03   | 27.03 | 21     | 4.76   | 4.76    | 4.76   |
|      |   |      |         |                | 2319.753 | 26.05  | 26.18   | 26.18 | 21     | 0.00   | 0.00    | 0.00   |
|      |   |      |         |                | 2383.515 | 28.47  | 28.59   | 28.59 | 21     | 4.76   | 4.76    | 4.76   |
|      |   |      |         |                | 2347.259 | 25.97  | 26.73   | 26.73 | 22     | 4.55   | 4.55    | 4.55   |
| C101 | 3 | 60%  | [1;100] | $\alpha = 2.5$ | 1967.187 | 27.96  | 28.16   | 28.16 | 17     | 11.76  | 11.76   | 11.76  |
|      |   |      |         |                | 2013.622 | 28.35  | 28.35   | 28.35 | 17     | 5.88   | 5.88    | 5.88   |
|      |   |      |         |                | 2099.891 | 30.81  | 30.81   | 30.81 | 18     | 5.56   | 5.56    | 5.56   |
|      |   |      |         |                | 2129.503 | 31.51  | 31.51   | 31.51 | 17     | 5.88   | 5.88    | 5.88   |
|      |   |      |         |                | 2111.906 | 30.45  | 31.51   | 31.51 | 18     | 5.56   | 5.56    | 5.56   |
| C101 | 3 | 60%  | [40;60] | $\alpha = 1.1$ | 3767.042 | 8.41   | 11.91   | 11.91 | 55     | -3.64  | 1.82    | 1.82   |
|      |   |      |         |                | 4074.157 | 2.35   | 13.86   | 13.86 | 59     | -13.56 | 3.39    | 3.39   |
|      |   |      |         |                | 4102.664 | 5.89   | 12.17   | 12.17 | 58     | -3.45  | 5.17    | 5.17   |
|      |   |      |         |                | 4012.531 | 5.78   | 12.32   | 12.32 | 58     | -6.90  | 1.72    | 1.72   |
|      |   |      |         |                | 4162.321 | 6.08   | 12.32   | 12.32 | 60     | -10.00 | 5.00    | 5.00   |
| C101 | 3 | 60%  | [40;60] | $\alpha = 1.5$ | 2887.756 | 15.75  | 16.05   | 16.05 | 39     | 2.56   | 2.56    | 2.56   |
|      |   |      |         |                | 3014.251 | 13.63  | 16.20   | 16.20 | 41     | 2.44   | 2.44    | 2.44   |
|      |   |      |         |                | 3099.377 | 13.50  | 15.77   | 15.77 | 40     | 0.00   | 2.50    | 2.50   |
|      |   |      |         |                | 3022.385 | 15.23  | 16.10   | 16.10 | 41     | 2.44   | 4.88    | 7.32   |
|      |   |      |         |                | 3076.154 | 10.09  | 13.10   | 14.09 | 41     | 0.00   | 0.00    | 4.88   |
| C101 | 3 | 60%  | [40;60] | $\alpha = 2$   | 2757.290 | 16.84  | 17.66   | 17.66 | 29     | 0.00   | 0.00    | 0.00   |
|      |   |      |         |                | 2965.860 | 19.88  | 20.89   | 20.89 | 31     | 0.00   | 3.23    | 3.23   |
|      |   |      |         |                | 2906.131 | 18.30  | 20.29   | 20.29 | 30     | 3.33   | 3.33    | 3.33   |
|      |   |      |         |                | 3008.556 | 19.82  | 21.31   | 21.31 | 31     | 3.23   | 3.23    | 3.23   |
|      |   |      |         |                | 2986.278 | 20.42  | 21.65   | 21.65 | 31     | -3.23  | 0.00    | 0.00   |
| C101 | 3 | 60%  | [40;60] | $\alpha = 2.5$ | 2372.239 | 20.45  | 20.94   | 20.94 | 23     | 0.00   | 4.35    | 4.35   |
|      |   |      |         |                | 2532.872 | 21.65  | 22.15   | 22.15 | 25     | 4.00   | 4.00    | 4.00   |
|      |   |      |         |                | 2488.310 | 21.63  | 22.54   | 22.54 | 25     | 8.00   | 8.00    | 8.00   |
|      |   |      |         |                | 2607.029 | 23.60  | 24.28   | 24.39 | 25     | 4.00   | 4.00    | 8.00   |
|      |   |      |         |                | 2546.721 | 24.22  | 24.22   | 24.22 | 25     | 4.00   | 4.00    | 4.00   |

|      |   |      |         |                |          | Cost   |       |         |       | Routes |       |         |       |
|------|---|------|---------|----------------|----------|--------|-------|---------|-------|--------|-------|---------|-------|
|      |   |      |         |                |          | C-VRP  | VRP   | C-SDVRP | SDVRP | C-VRP  | VRP   | C-SDVRP | SDVRP |
| C101 | 3 | 100% | [1;100] | $\alpha = 1.1$ | 4689.870 | 19.31  | 26.26 | 26.26   | 54    | -9.26  | -1.85 | -1.85   |       |
|      |   |      |         |                | 4543.522 | 21.79  | 27.04 | 27.04   | 54    | -5.56  | 1.85  | 1.85    |       |
|      |   |      |         |                | 4559.014 | 22.98  | 27.73 | 27.73   | 53    | -3.77  | 0.00  | 0.00    |       |
|      |   |      |         |                | 4861.866 | 22.80  | 29.45 | 29.45   | 57    | -10.53 | 0.00  | 0.00    |       |
|      |   |      |         |                | 4564.600 | 25.43  | 29.57 | 29.57   | 52    | -7.69  | 0.00  | 0.00    |       |
| C101 | 3 | 100% | [1;100] | $\alpha = 1.5$ | 3767.661 | 30.72  | 30.72 | 30.72   | 40    | 0.00   | 0.00  | 0.00    |       |
|      |   |      |         |                | 3681.521 | 30.94  | 31.69 | 31.69   | 39    | -2.56  | -2.56 | -2.56   |       |
|      |   |      |         |                | 3695.468 | 30.60  | 31.48 | 31.48   | 38    | -2.63  | -5.26 | -5.26   |       |
|      |   |      |         |                | 3901.570 | 32.15  | 32.29 | 32.29   | 41    | -2.44  | -4.88 | -4.88   |       |
|      |   |      |         |                | 3681.245 | 32.25  | 33.29 | 33.36   | 39    | 0.00   | 2.56  | 7.69    |       |
| C101 | 3 | 100% | [1;100] | $\alpha = 2$   | 3115.395 | 24.76  | 26.16 | 26.16   | 30    | 0.00   | 3.33  | 3.33    |       |
|      |   |      |         |                | 3010.599 | 24.99  | 27.16 | 27.16   | 30    | 0.00   | 6.67  | 6.67    |       |
|      |   |      |         |                | 3021.497 | 23.64  | 25.18 | 25.30   | 29    | 0.00   | 3.45  | 3.45    |       |
|      |   |      |         |                | 3218.612 | 24.19  | 25.12 | 25.12   | 31    | 0.00   | 3.23  | 3.23    |       |
|      |   |      |         |                | 3036.387 | 25.01  | 25.98 | 25.98   | 28    | -3.57  | 0.00  | 0.00    |       |
| C101 | 3 | 100% | [1;100] | $\alpha = 2.5$ | 2743.039 | 28.85  | 29.65 | 29.65   | 24    | 0.00   | 4.17  | 4.17    |       |
|      |   |      |         |                | 2705.842 | 30.51  | 30.85 | 30.85   | 24    | 4.17   | 4.17  | 4.17    |       |
|      |   |      |         |                | 2719.055 | 30.61  | 31.32 | 31.32   | 24    | 4.17   | 4.17  | 4.17    |       |
|      |   |      |         |                | 2782.399 | 27.30  | 27.63 | 27.63   | 25    | 0.00   | 0.00  | 0.00    |       |
|      |   |      |         |                | 2692.934 | 29.04  | 29.04 | 29.58   | 23    | 4.35   | 4.35  | 4.35    |       |
| C101 | 3 | 100% | [40;60] | $\alpha = 1.1$ | 6888.845 | 16.23  | 23.94 | 23.94   | 87    | -14.94 | -1.15 | -1.15   |       |
|      |   |      |         |                | 6745.516 | 14.45  | 23.75 | 23.75   | 86    | -16.28 | -1.16 | -1.16   |       |
|      |   |      |         |                | 6782.676 | 14.92  | 23.32 | 23.32   | 86    | -16.28 | -1.16 | -1.16   |       |
|      |   |      |         |                | 6980.297 | 17.32  | 24.19 | 24.19   | 90    | -11.11 | 0.00  | 0.00    |       |
|      |   |      |         |                | 6789.760 | 15.00  | 23.79 | 24.68   | 87    | -14.94 | 0.00  | 8.05    |       |
| C101 | 3 | 100% | [40;60] | $\alpha = 1.5$ | 5143.231 | -11.97 | 26.33 | 26.33   | 61    | -62.30 | 0.00  | 0.00    |       |
|      |   |      |         |                | 5099.061 | -11.99 | 25.69 | 25.69   | 61    | -60.66 | -1.64 | -1.64   |       |
|      |   |      |         |                | 5102.211 | -12.57 | 26.46 | 26.46   | 60    | -65.00 | -1.67 | -1.67   |       |
|      |   |      |         |                | 5207.974 | -10.81 | 26.28 | 26.28   | 63    | -58.73 | 0.00  | 0.00    |       |
|      |   |      |         |                | 5138.823 | -12.02 | 25.56 | 25.56   | 62    | -59.68 | -1.61 | -1.61   |       |
| C101 | 3 | 100% | [40;60] | $\alpha = 2$   | 4203.584 | 14.47  | 20.46 | 20.65   | 46    | -8.70  | 2.17  | 4.35    |       |
|      |   |      |         |                | 4147.408 | 13.31  | 19.88 | 19.88   | 46    | -8.70  | 2.17  | 2.17    |       |
|      |   |      |         |                | 4139.095 | 13.14  | 19.83 | 19.83   | 45    | -11.11 | 2.22  | 2.22    |       |
|      |   |      |         |                | 4221.187 | 14.83  | 18.87 | 20.14   | 46    | -8.70  | 0.00  | 4.35    |       |
|      |   |      |         |                | 4172.640 | 13.84  | 19.01 | 19.01   | 45    | -11.11 | 0.00  | 0.00    |       |
| C101 | 3 | 100% | [40;60] | $\alpha = 2.5$ | 3616.912 | 13.53  | 22.38 | 22.38   | 36    | -16.67 | 0.00  | 0.00    |       |
|      |   |      |         |                | 3615.422 | 17.72  | 24.03 | 24.03   | 36    | -11.11 | 0.00  | 0.00    |       |
|      |   |      |         |                | 3587.273 | 15.08  | 23.22 | 23.22   | 36    | -13.89 | 0.00  | 0.00    |       |
|      |   |      |         |                | 3673.977 | 11.92  | 23.70 | 23.70   | 37    | -18.92 | 2.70  | 2.70    |       |
|      |   |      |         |                | 3653.121 | 16.30  | 24.25 | 24.25   | 37    | -10.81 | 2.70  | 5.41    |       |
| R101 | 2 | 60%  | [1;100] | $\alpha = 1.1$ | 2171.129 | 10.52  | 11.74 | 11.74   | 31    | -3.23  | 0.00  | 0.00    |       |
|      |   |      |         |                | 2423.915 | 8.98   | 11.15 | 11.15   | 36    | 2.78   | 2.78  | 2.78    |       |
|      |   |      |         |                | 2200.299 | 12.20  | 12.41 | 12.41   | 33    | -3.03  | 0.00  | 0.00    |       |
|      |   |      |         |                | 2205.255 | 9.79   | 10.62 | 10.62   | 33    | 0.00   | 3.03  | 3.03    |       |
|      |   |      |         |                | 2085.412 | 11.09  | 12.07 | 12.07   | 32    | -3.13  | 0.00  | 0.00    |       |
| R101 | 2 | 60%  | [1;100] | $\alpha = 1.5$ | 1821.012 | 17.22  | 17.80 | 17.80   | 23    | 0.00   | 0.00  | 4.35    |       |
|      |   |      |         |                | 1939.364 | 12.17  | 13.07 | 13.07   | 26    | 0.00   | 3.85  | 3.85    |       |
|      |   |      |         |                | 1801.106 | 15.00  | 15.00 | 15.00   | 24    | 0.00   | 0.00  | 0.00    |       |
|      |   |      |         |                | 1812.441 | 14.25  | 14.52 | 15.51   | 25    | 4.00   | 4.00  | 8.00    |       |
|      |   |      |         |                | 1724.157 | 14.39  | 14.39 | 14.39   | 24    | 0.00   | 0.00  | 0.00    |       |
| R101 | 2 | 60%  | [1;100] | $\alpha = 2$   | 1539.156 | 20.29  | 20.29 | 20.29   | 18    | 5.56   | 5.56  | 5.56    |       |
|      |   |      |         |                | 1646.249 | 17.18  | 17.18 | 17.23   | 20    | 5.00   | 5.00  | 5.00    |       |
|      |   |      |         |                | 1519.302 | 17.43  | 17.43 | 17.43   | 18    | 0.00   | 0.00  | 0.00    |       |
|      |   |      |         |                | 1521.142 | 16.63  | 16.63 | 16.63   | 18    | 0.00   | 0.00  | 0.00    |       |
|      |   |      |         |                | 1501.935 | 18.63  | 19.89 | 19.89   | 18    | 0.00   | 5.56  | 5.56    |       |
| R101 | 2 | 60%  | [1;100] | $\alpha = 2.5$ | 1377.657 | 22.53  | 22.53 | 22.53   | 14    | 0.00   | 0.00  | 0.00    |       |
|      |   |      |         |                | 1466.531 | 19.67  | 19.67 | 19.67   | 16    | 6.25   | 6.25  | 6.25    |       |
|      |   |      |         |                | 1384.193 | 21.43  | 21.47 | 21.47   | 15    | 6.67   | 6.67  | 6.67    |       |
|      |   |      |         |                | 1383.995 | 20.16  | 20.33 | 20.33   | 14    | 0.00   | 0.00  | 0.00    |       |
|      |   |      |         |                | 1350.074 | 21.07  | 22.17 | 22.17   | 14    | 0.00   | 0.00  | 0.00    |       |

|      |   |      |         |                | Cost     |        |         |       | Routes |        |         |       |
|------|---|------|---------|----------------|----------|--------|---------|-------|--------|--------|---------|-------|
|      |   |      |         |                | C-VRP    | VRP    | C-SDVRP | SDVRP | C-VRP  | VRP    | C-SDVRP | SDVRP |
| R101 | 2 | 60%  | [40;60] | $\alpha = 1.1$ | 3584.706 | 5.95   | 6.31    | 15.08 | 62     | 0.00   | 1.61    | 14.52 |
|      |   |      |         |                | 3811.362 | 5.18   | 6.20    | 8.17  | 65     | -1.54  | -1.54   | 9.23  |
|      |   |      |         |                | 3616.763 | 6.80   | 7.53    | 7.53  | 64     | 3.13   | 3.13    | 3.13  |
|      |   |      |         |                | 3685.616 | 6.29   | 7.58    | 9.59  | 67     | 2.99   | 5.97    | 14.93 |
|      |   |      |         |                | 3525.042 | 6.45   | 7.25    | 7.86  | 64     | 3.13   | 4.69    | 14.06 |
| R101 | 2 | 60%  | [40;60] | $\alpha = 1.5$ | 2696.557 | 8.44   | 9.58    | 9.58  | 43     | 0.00   | 2.33    | 2.33  |
|      |   |      |         |                | 2828.783 | 7.27   | 7.70    | 7.70  | 45     | -4.44  | -2.22   | -2.22 |
|      |   |      |         |                | 2695.828 | 9.95   | 9.95    | 9.95  | 43     | 2.33   | 4.65    | 4.65  |
|      |   |      |         |                | 2761.495 | 8.31   | 9.35    | 9.35  | 45     | -2.22  | 0.00    | 0.00  |
|      |   |      |         |                | 2648.764 | 7.57   | 7.86    | 12.52 | 42     | -4.76  | -2.38   | 7.14  |
| R101 | 2 | 60%  | [40;60] | $\alpha = 2$   | 2171.049 | 11.58  | 12.69   | 14.41 | 31     | 0.00   | 3.23    | 6.45  |
|      |   |      |         |                | 2270.247 | 11.82  | 12.11   | 12.11 | 33     | 0.00   | 3.03    | 3.03  |
|      |   |      |         |                | 2141.877 | 11.25  | 11.45   | 13.80 | 31     | 3.23   | 0.00    | 6.45  |
|      |   |      |         |                | 2183.589 | 11.91  | 12.28   | 12.28 | 32     | 0.00   | 3.13    | 3.13  |
|      |   |      |         |                | 2143.004 | 12.55  | 13.56   | 13.56 | 32     | 3.13   | 6.25    | 6.25  |
| R101 | 2 | 60%  | [40;60] | $\alpha = 2.5$ | 1861.888 | 14.37  | 14.75   | 15.02 | 25     | 0.00   | 4.00    | 4.00  |
|      |   |      |         |                | 1919.354 | 12.38  | 13.08   | 13.23 | 25     | -4.00  | 0.00    | 0.00  |
|      |   |      |         |                | 1835.493 | 13.66  | 13.98   | 13.98 | 25     | 4.00   | 4.00    | 4.00  |
|      |   |      |         |                | 1862.912 | 13.14  | 13.63   | 13.63 | 25     | 0.00   | 4.00    | 4.00  |
|      |   |      |         |                | 1821.766 | 13.84  | 14.31   | 14.82 | 25     | 0.00   | 4.00    | 8.00  |
| R101 | 2 | 100% | [1;100] | $\alpha = 1.1$ | 3162.893 | 7.36   | 12.37   | 12.37 | 50     | -6.00  | 2.00    | 2.00  |
|      |   |      |         |                | 3242.014 | 7.75   | 12.57   | 12.57 | 51     | -5.88  | 1.96    | 1.96  |
|      |   |      |         |                | 3414.326 | 8.23   | 11.64   | 11.64 | 54     | -5.56  | 1.85    | 1.85  |
|      |   |      |         |                | 3406.702 | 6.52   | 10.50   | 10.50 | 53     | -5.66  | -1.89   | -1.89 |
|      |   |      |         |                | 3218.451 | 8.81   | 12.98   | 12.98 | 50     | -4.00  | 2.00    | 2.00  |
| R101 | 2 | 100% | [1;100] | $\alpha = 1.5$ | 2569.835 | 14.65  | 17.18   | 17.18 | 37     | 2.70   | 2.70    | 2.70  |
|      |   |      |         |                | 2600.007 | 14.60  | 15.60   | 15.60 | 36     | -2.78  | -2.78   | -2.78 |
|      |   |      |         |                | 2705.306 | 13.26  | 15.00   | 15.91 | 39     | -2.56  | 0.00    | 2.56  |
|      |   |      |         |                | 2712.229 | 12.35  | 14.94   | 14.94 | 39     | -2.56  | 0.00    | 0.00  |
|      |   |      |         |                | 2579.324 | 15.50  | 16.66   | 17.24 | 36     | -2.78  | 0.00    | 2.78  |
| R101 | 2 | 100% | [1;100] | $\alpha = 2$   | 2148.455 | 19.03  | 20.13   | 20.13 | 27     | -3.70  | 0.00    | 0.00  |
|      |   |      |         |                | 2170.972 | 19.55  | 20.30   | 20.30 | 28     | 3.57   | 3.57    | 3.57  |
|      |   |      |         |                | 2249.741 | 17.97  | 19.39   | 19.39 | 29     | -3.45  | 0.00    | 0.00  |
|      |   |      |         |                | 2254.327 | 16.98  | 18.94   | 18.94 | 29     | 0.00   | 0.00    | 0.00  |
|      |   |      |         |                | 2137.734 | 19.66  | 19.66   | 19.66 | 27     | 0.00   | 0.00    | 0.00  |
| R101 | 2 | 100% | [1;100] | $\alpha = 2.5$ | 1891.653 | 22.06  | 22.74   | 22.74 | 21     | -4.76  | 0.00    | 0.00  |
|      |   |      |         |                | 1922.106 | 23.57  | 23.72   | 23.72 | 22     | 0.00   | 0.00    | 0.00  |
|      |   |      |         |                | 1981.712 | 21.82  | 22.64   | 22.64 | 23     | -4.35  | 0.00    | 0.00  |
|      |   |      |         |                | 1984.528 | 21.81  | 22.10   | 22.10 | 23     | 0.00   | 0.00    | -4.35 |
|      |   |      |         |                | 1907.000 | 23.89  | 24.94   | 24.94 | 22     | 0.00   | 4.55    | 4.55  |
| R101 | 2 | 100% | [40;60] | $\alpha = 1.1$ | 5350.834 | 6.75   | 8.83    | 14.06 | 96     | -4.17  | 2.08    | 8.33  |
|      |   |      |         |                | 5394.429 | 7.51   | 9.44    | 12.19 | 97     | -3.09  | 0.00    | 8.25  |
|      |   |      |         |                | 5457.903 | 8.58   | 9.23    | 15.18 | 99     | -1.01  | 0.00    | 13.13 |
|      |   |      |         |                | 5461.201 | 8.64   | 10.16   | 14.86 | 99     | -1.01  | 2.02    | 12.12 |
|      |   |      |         |                | 5364.699 | 7.00   | 10.29   | 15.82 | 97     | -3.09  | 2.06    | 13.40 |
| R101 | 2 | 100% | [40;60] | $\alpha = 1.5$ | 3924.473 | -17.40 | 10.41   | 10.41 | 64     | -40.63 | 1.56    | 1.56  |
|      |   |      |         |                | 3960.640 | -20.11 | 9.49    | 9.49  | 65     | -43.08 | 1.54    | 1.54  |
|      |   |      |         |                | 3993.728 | -20.31 | 10.04   | 10.04 | 66     | -43.94 | 1.52    | 1.52  |
|      |   |      |         |                | 3958.881 | -20.32 | 9.48    | 9.48  | 65     | -44.62 | 1.54    | 1.54  |
|      |   |      |         |                | 3920.891 | -17.62 | 10.85   | 10.85 | 64     | -43.75 | 1.56    | 1.56  |
| R101 | 2 | 100% | [40;60] | $\alpha = 2$   | 3069.032 | 8.65   | 13.97   | 13.97 | 45     | -11.11 | -2.22   | -2.22 |
|      |   |      |         |                | 3113.432 | 9.96   | 14.27   | 16.33 | 46     | -8.70  | 0.00    | 4.35  |
|      |   |      |         |                | 3121.374 | 10.18  | 13.80   | 13.80 | 48     | -4.17  | 2.08    | 2.08  |
|      |   |      |         |                | 3129.899 | 10.43  | 13.59   | 13.59 | 46     | -8.70  | -2.17   | -2.17 |
|      |   |      |         |                | 3067.263 | 8.60   | 13.42   | 13.42 | 46     | -8.70  | -2.17   | -2.17 |
| R101 | 2 | 100% | [40;60] | $\alpha = 2.5$ | 2593.563 | 14.56  | 16.97   | 17.77 | 36     | -2.78  | 2.78    | 5.56  |
|      |   |      |         |                | 2629.093 | 11.84  | 15.79   | 17.77 | 36     | -8.33  | -2.78   | 2.78  |
|      |   |      |         |                | 2628.353 | 10.05  | 15.44   | 15.44 | 37     | -8.11  | 2.70    | 2.70  |
|      |   |      |         |                | 2642.311 | 10.67  | 16.56   | 16.56 | 37     | -10.81 | 2.70    | 2.70  |
|      |   |      |         |                | 2575.081 | 12.76  | 16.12   | 16.12 | 35     | -8.57  | -2.86   | -2.86 |

|      |   |      |         |                |          | Cost  |       |         |       | Routes |       |         |       |
|------|---|------|---------|----------------|----------|-------|-------|---------|-------|--------|-------|---------|-------|
|      |   |      |         |                |          | C-VRP | VRP   | C-SDVRP | SDVRP | C-VRP  | VRP   | C-SDVRP | SDVRP |
| R101 | 3 | 60%  | [1;100] | $\alpha = 1.1$ | 2625.144 | 18.63 | 20.31 | 20.31   | 35    | -2.86  | 0.00  | 0.00    |       |
|      |   |      |         |                | 2779.207 | 17.62 | 19.08 | 19.08   | 37    | 0.00   | 0.00  | 0.00    |       |
|      |   |      |         |                | 2657.458 | 16.33 | 19.56 | 19.56   | 38    | -2.63  | 2.63  | 2.63    |       |
|      |   |      |         |                | 2693.013 | 18.69 | 20.84 | 20.84   | 37    | 0.00   | 2.70  | 2.70    |       |
|      |   |      |         |                | 2735.813 | 17.58 | 19.40 | 19.40   | 40    | 0.00   | 5.00  | 5.00    |       |
| R101 | 3 | 60%  | [1;100] | $\alpha = 1.5$ | 2210.472 | 24.31 | 25.89 | 25.89   | 26    | 0.00   | 3.85  | 3.85    |       |
|      |   |      |         |                | 2318.206 | 23.23 | 25.12 | 25.12   | 27    | 0.00   | 3.70  | 3.70    |       |
|      |   |      |         |                | 2205.685 | 22.10 | 23.43 | 23.43   | 28    | 3.57   | 3.57  | 3.57    |       |
|      |   |      |         |                | 2247.082 | 24.43 | 24.55 | 24.55   | 27    | 0.00   | 0.00  | 0.00    |       |
|      |   |      |         |                | 2284.628 | 23.73 | 25.20 | 25.20   | 29    | 3.45   | 3.45  | 3.45    |       |
| R101 | 3 | 60%  | [1;100] | $\alpha = 2$   | 1931.836 | 29.83 | 30.42 | 30.42   | 20    | 5.00   | 5.00  | 5.00    |       |
|      |   |      |         |                | 2024.393 | 29.77 | 29.98 | 29.98   | 21    | 4.76   | 4.76  | 4.76    |       |
|      |   |      |         |                | 1937.057 | 28.36 | 28.64 | 28.64   | 21    | 0.00   | 0.00  | 0.00    |       |
|      |   |      |         |                | 1966.806 | 29.37 | 29.56 | 29.56   | 20    | 0.00   | 0.00  | 0.00    |       |
|      |   |      |         |                | 1971.352 | 29.59 | 30.11 | 30.11   | 22    | 4.55   | 4.55  | 4.55    |       |
| R101 | 3 | 60%  | [1;100] | $\alpha = 2.5$ | 1781.196 | 35.61 | 35.61 | 35.61   | 17    | 11.76  | 11.76 | 11.76   |       |
|      |   |      |         |                | 1859.778 | 34.70 | 34.70 | 34.70   | 18    | 11.11  | 11.11 | 11.11   |       |
|      |   |      |         |                | 1773.677 | 32.63 | 33.02 | 33.02   | 18    | 5.56   | 11.11 | 11.11   |       |
|      |   |      |         |                | 1815.362 | 34.44 | 34.44 | 34.44   | 17    | 5.88   | 5.88  | 5.88    |       |
|      |   |      |         |                | 1807.247 | 32.99 | 33.41 | 33.41   | 18    | 5.56   | 5.56  | 5.56    |       |
| R101 | 3 | 60%  | [40;60] | $\alpha = 1.1$ | 3582.664 | 12.53 | 14.92 | 14.92   | 55    | -3.64  | 1.82  | 1.82    |       |
|      |   |      |         |                | 3829.615 | 7.79  | 14.39 | 14.39   | 60    | -8.33  | 3.33  | 3.33    |       |
|      |   |      |         |                | 3570.315 | 9.78  | 14.98 | 14.98   | 57    | -7.02  | 1.75  | 1.75    |       |
|      |   |      |         |                | 3711.417 | 9.47  | 15.77 | 15.77   | 59    | -8.47  | 3.39  | 3.39    |       |
|      |   |      |         |                | 3662.966 | 6.53  | 14.15 | 14.15   | 59    | -10.17 | 0.00  | 0.00    |       |
| R101 | 3 | 60%  | [40;60] | $\alpha = 1.5$ | 2769.876 | 18.76 | 19.32 | 19.32   | 39    | 2.56   | 5.13  | 5.13    |       |
|      |   |      |         |                | 2930.980 | 16.69 | 18.91 | 18.91   | 40    | -2.50  | 0.00  | 0.00    |       |
|      |   |      |         |                | 2766.485 | 17.15 | 18.48 | 18.48   | 40    | -2.50  | 2.50  | 2.50    |       |
|      |   |      |         |                | 2848.578 | 17.82 | 18.72 | 18.72   | 41    | 2.44   | 2.44  | 2.44    |       |
|      |   |      |         |                | 2879.188 | 16.59 | 17.62 | 17.62   | 41    | -2.44  | 0.00  | 0.00    |       |
| R101 | 3 | 60%  | [40;60] | $\alpha = 2$   | 2329.760 | 21.82 | 22.48 | 22.48   | 28    | -3.57  | -3.57 | -3.57   |       |
|      |   |      |         |                | 2475.615 | 22.27 | 22.61 | 23.60   | 31    | 3.23   | 3.23  | 6.45    |       |
|      |   |      |         |                | 2307.931 | 21.94 | 22.84 | 22.84   | 30    | 0.00   | 3.33  | 3.33    |       |
|      |   |      |         |                | 2399.262 | 22.85 | 23.13 | 23.13   | 31    | 3.23   | 3.23  | 3.23    |       |
|      |   |      |         |                | 2368.103 | 20.56 | 21.58 | 21.58   | 31    | 0.00   | 3.23  | 3.23    |       |
| R101 | 3 | 60%  | [40;60] | $\alpha = 2.5$ | 2088.007 | 27.76 | 27.82 | 27.82   | 23    | 0.00   | 0.00  | 0.00    |       |
|      |   |      |         |                | 2193.205 | 26.24 | 26.89 | 26.89   | 25    | 4.00   | 4.00  | 4.00    |       |
|      |   |      |         |                | 2034.991 | 25.27 | 26.01 | 26.01   | 24    | 4.17   | 4.17  | 4.17    |       |
|      |   |      |         |                | 2122.403 | 25.87 | 26.54 | 26.54   | 25    | 4.00   | 4.00  | 4.00    |       |
|      |   |      |         |                | 2120.126 | 26.09 | 26.25 | 26.25   | 25    | 4.00   | 4.00  | 4.00    |       |
| R101 | 3 | 100% | [1;100] | $\alpha = 1.1$ | 3889.268 | 13.09 | 21.02 | 21.02   | 54    | -9.26  | 0.00  | 0.00    |       |
|      |   |      |         |                | 3792.491 | 16.47 | 22.32 | 22.32   | 53    | -7.55  | 1.89  | 1.89    |       |
|      |   |      |         |                | 3784.141 | 16.25 | 21.10 | 21.31   | 53    | -3.77  | 1.89  | 3.77    |       |
|      |   |      |         |                | 3903.158 | 15.14 | 20.43 | 20.43   | 56    | -10.71 | 0.00  | 0.00    |       |
|      |   |      |         |                | 3715.064 | 18.91 | 23.21 | 23.21   | 52    | -5.77  | 1.92  | 1.92    |       |
| R101 | 3 | 100% | [1;100] | $\alpha = 1.5$ | 3174.655 | 24.15 | 26.13 | 26.13   | 39    | -5.13  | -2.56 | -2.56   |       |
|      |   |      |         |                | 3151.830 | 25.20 | 28.13 | 28.13   | 39    | -2.56  | 2.56  | 2.56    |       |
|      |   |      |         |                | 3129.185 | 24.36 | 26.60 | 26.60   | 39    | -2.56  | 2.56  | 2.56    |       |
|      |   |      |         |                | 3225.508 | 22.93 | 26.49 | 26.49   | 42    | -2.38  | 4.76  | 4.76    |       |
|      |   |      |         |                | 3091.706 | 26.67 | 29.14 | 29.14   | 38    | -2.63  | 2.63  | 2.63    |       |
| R101 | 3 | 100% | [1;100] | $\alpha = 2$   | 2746.275 | 31.16 | 32.28 | 32.28   | 30    | 0.00   | 3.33  | 3.33    |       |
|      |   |      |         |                | 2725.810 | 32.30 | 33.36 | 33.36   | 30    | 3.33   | 3.33  | 3.33    |       |
|      |   |      |         |                | 2710.497 | 31.68 | 32.64 | 32.64   | 29    | 0.00   | 0.00  | 0.00    |       |
|      |   |      |         |                | 2776.340 | 30.86 | 32.41 | 32.49   | 31    | 0.00   | 3.23  | 3.23    |       |
|      |   |      |         |                | 2661.961 | 32.63 | 33.67 | 33.67   | 28    | -3.57  | 0.00  | 0.00    |       |
| R101 | 3 | 100% | [1;100] | $\alpha = 2.5$ | 2495.365 | 35.93 | 36.73 | 36.73   | 24    | 0.00   | 0.00  | 0.00    |       |
|      |   |      |         |                | 2479.650 | 37.65 | 37.93 | 37.93   | 24    | 4.17   | 4.17  | 4.17    |       |
|      |   |      |         |                | 2466.813 | 37.14 | 37.14 | 37.14   | 24    | 4.17   | 4.17  | 4.17    |       |
|      |   |      |         |                | 2528.764 | 36.17 | 36.84 | 36.84   | 25    | 0.00   | 4.00  | 4.00    |       |
|      |   |      |         |                | 2466.474 | 38.11 | 38.75 | 38.75   | 24    | 4.17   | 4.17  | 4.17    |       |

|      |   |      |         |                | Cost     |        |         |       | Routes |        |         |       |
|------|---|------|---------|----------------|----------|--------|---------|-------|--------|--------|---------|-------|
|      |   |      |         |                | C-VRP    | VRP    | C-SDVRP | SDVRP | C-VRP  | VRP    | C-SDVRP | SDVRP |
| R101 | 3 | 100% | [40;60] | $\alpha = 1.1$ | 5505.776 | 9.38   | 16.31   | 16.31 | 87     | -14.94 | -1.15   | -1.15 |
|      |   |      |         |                | 5423.635 | 8.01   | 16.29   | 16.29 | 87     | -14.94 | 1.15    | 1.15  |
|      |   |      |         |                | 5438.792 | 8.26   | 16.15   | 16.15 | 85     | -17.65 | -1.18   | -1.18 |
|      |   |      |         |                | 5567.774 | 10.39  | 15.98   | 16.23 | 89     | -12.36 | -1.12   | 2.25  |
|      |   |      |         |                | 5457.762 | 8.58   | 16.79   | 16.79 | 86     | -16.28 | -1.16   | -1.16 |
| R101 | 3 | 100% | [40;60] | $\alpha = 1.5$ | 4222.251 | -17.60 | 19.20   | 19.20 | 60     | -65.00 | -1.67   | -1.67 |
|      |   |      |         |                | 4217.012 | -15.13 | 20.00   | 20.00 | 61     | -60.66 | 1.64    | 1.64  |
|      |   |      |         |                | 4208.566 | -18.25 | 18.98   | 18.98 | 61     | -62.30 | 1.64    | 1.64  |
|      |   |      |         |                | 4253.320 | -17.31 | 19.30   | 19.30 | 63     | -58.73 | 3.17    | 3.17  |
|      |   |      |         |                | 4207.618 | -18.08 | 18.40   | 18.40 | 61     | -62.30 | 0.00    | 0.00  |
| R101 | 3 | 100% | [40;60] | $\alpha = 2$   | 3495.279 | 19.79  | 24.49   | 24.49 | 45     | -11.11 | 0.00    | 0.00  |
|      |   |      |         |                | 3463.367 | 19.05  | 24.64   | 24.64 | 46     | -8.70  | 2.17    | 2.17  |
|      |   |      |         |                | 3464.982 | 19.09  | 24.95   | 24.95 | 45     | -11.11 | 2.22    | 2.22  |
|      |   |      |         |                | 3523.642 | 20.44  | 24.61   | 24.61 | 47     | -6.38  | 2.13    | 2.13  |
|      |   |      |         |                | 3478.701 | 19.41  | 24.66   | 24.66 | 46     | -8.70  | 2.17    | 2.17  |
| R101 | 3 | 100% | [40;60] | $\alpha = 2.5$ | 3065.895 | 19.29  | 28.40   | 28.40 | 36     | -16.67 | 0.00    | 0.00  |
|      |   |      |         |                | 3022.741 | 20.99  | 27.66   | 28.06 | 36     | -11.11 | 0.00    | 2.78  |
|      |   |      |         |                | 3020.210 | 20.97  | 27.42   | 27.42 | 36     | -13.89 | 0.00    | 0.00  |
|      |   |      |         |                | 3061.249 | 17.12  | 26.78   | 26.78 | 37     | -21.62 | 0.00    | 0.00  |
|      |   |      |         |                | 3042.230 | 21.62  | 28.36   | 28.36 | 36     | -13.89 | 0.00    | 0.00  |
